# Supplementary material
Source: PubMed Central journal article supplement (PMC4930427)

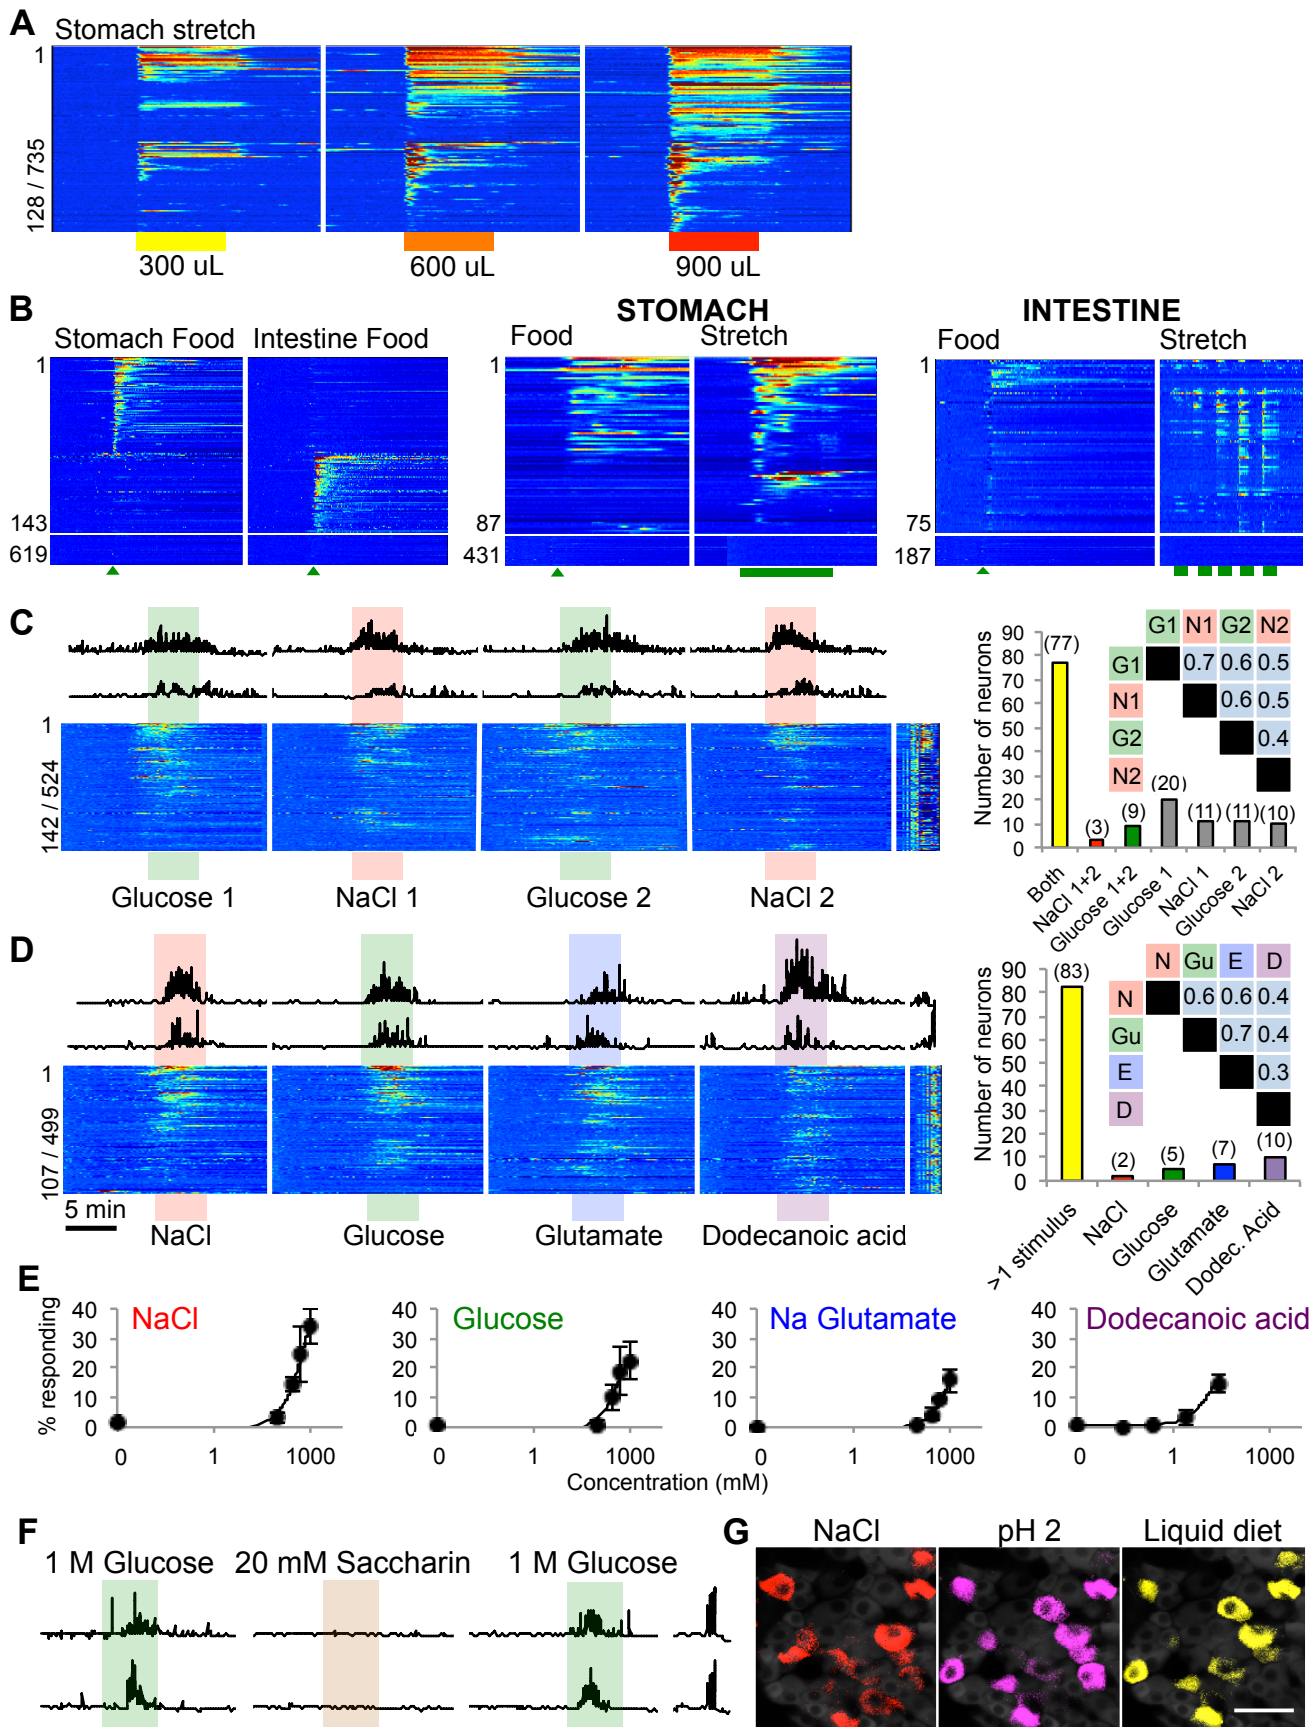

Figure S1

Supplement: NIHMS784774-supplement-1.pdf [file NIHMS784774-supplement-1.pdf]

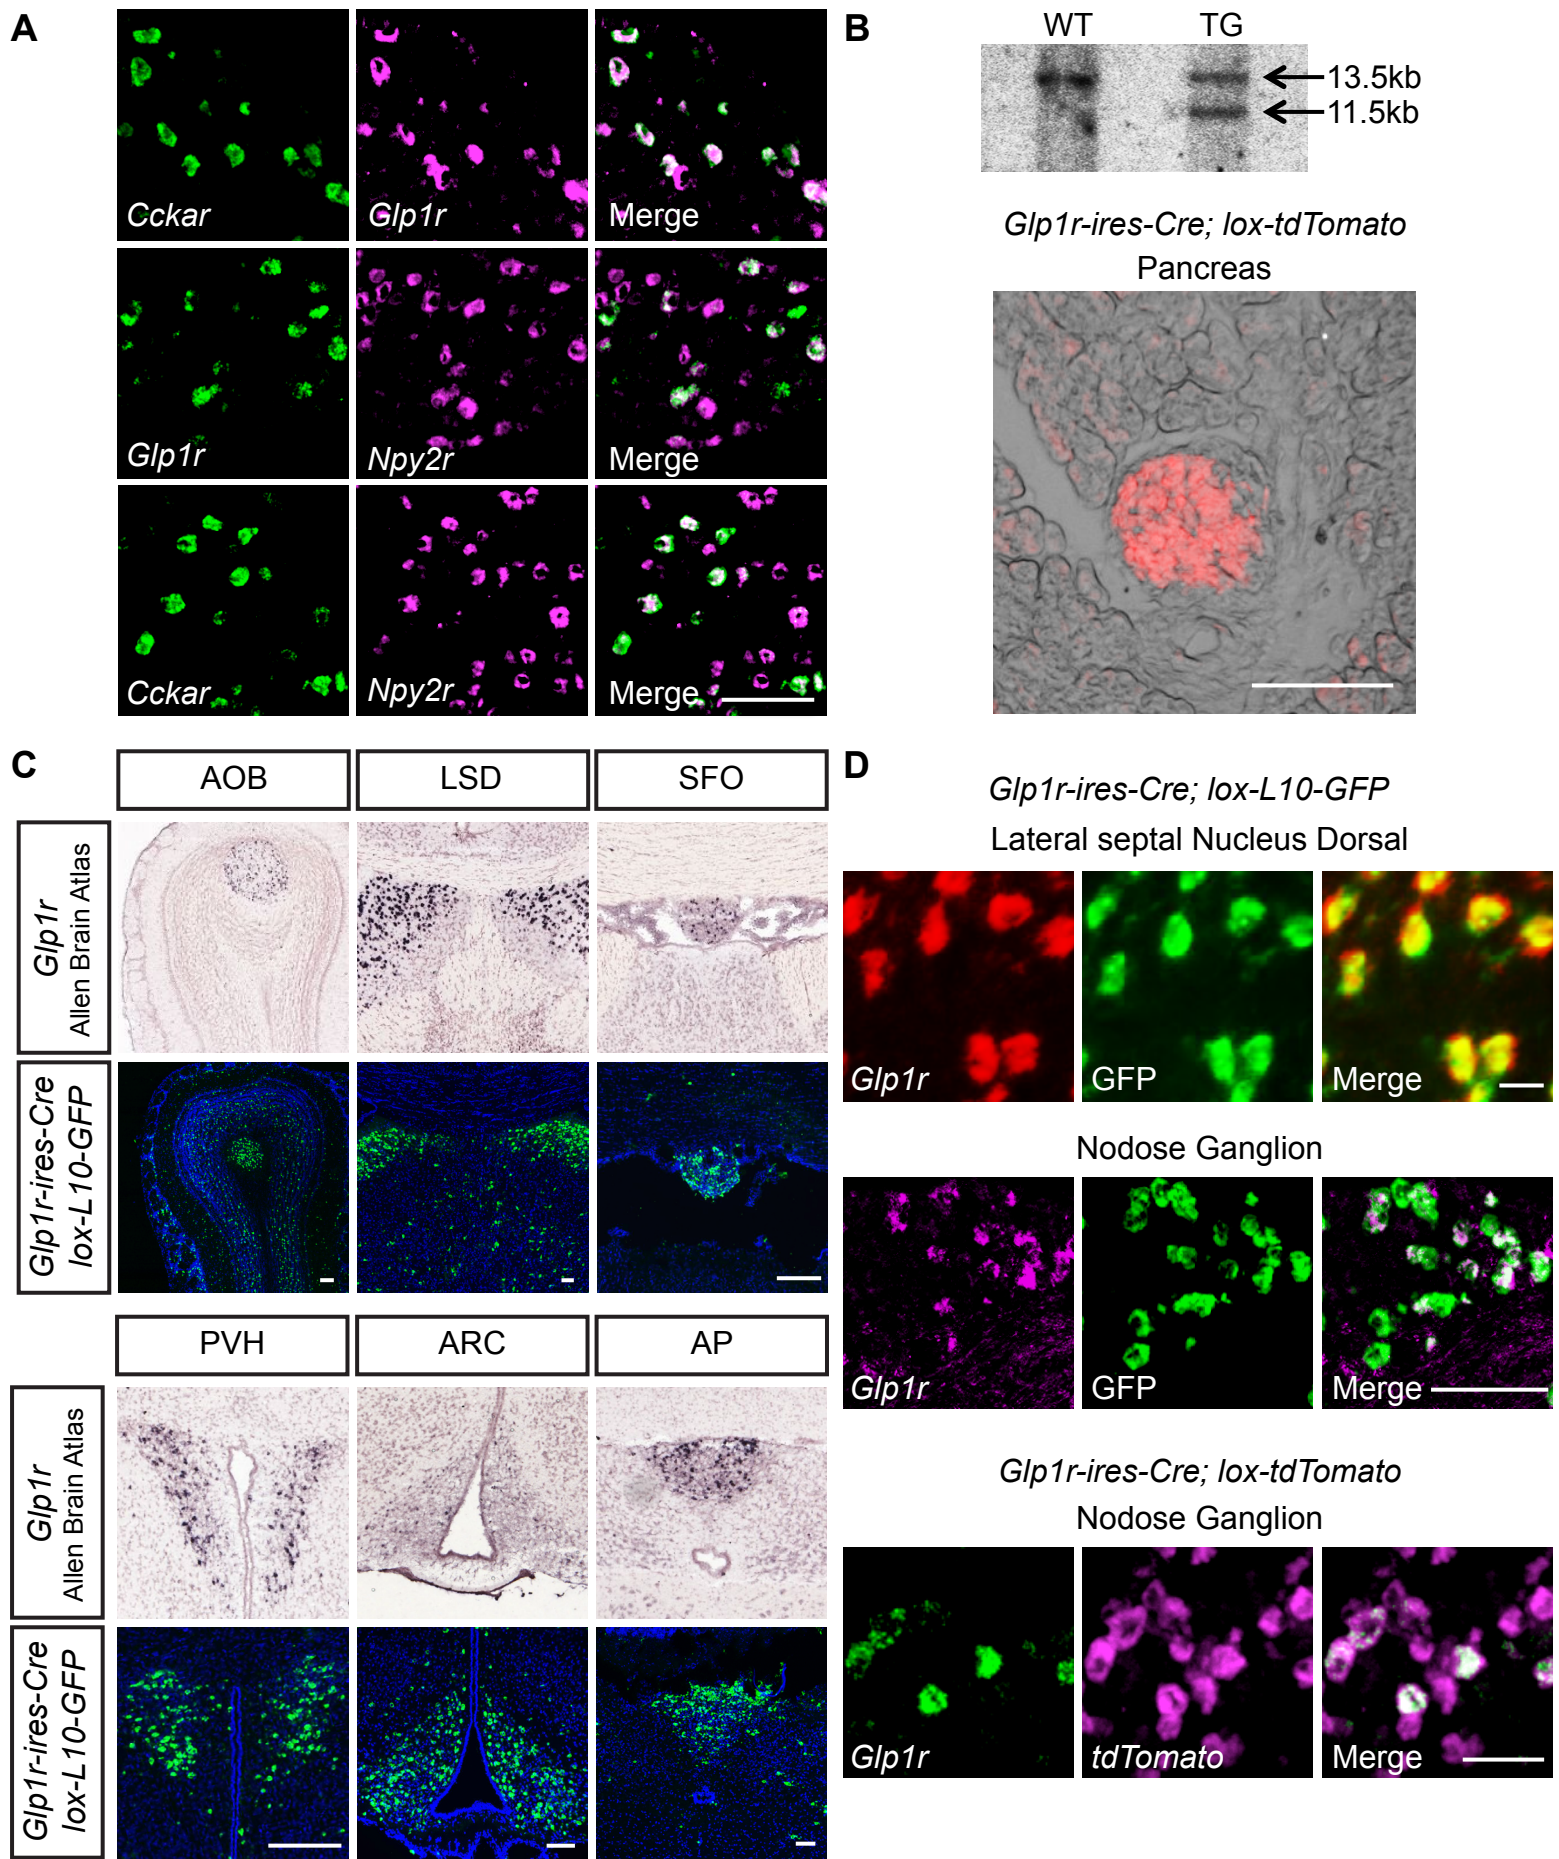

**Figure S3**

Supplement: NIHMS784774-supplement-3.pdf [file NIHMS784774-supplement-3.pdf]

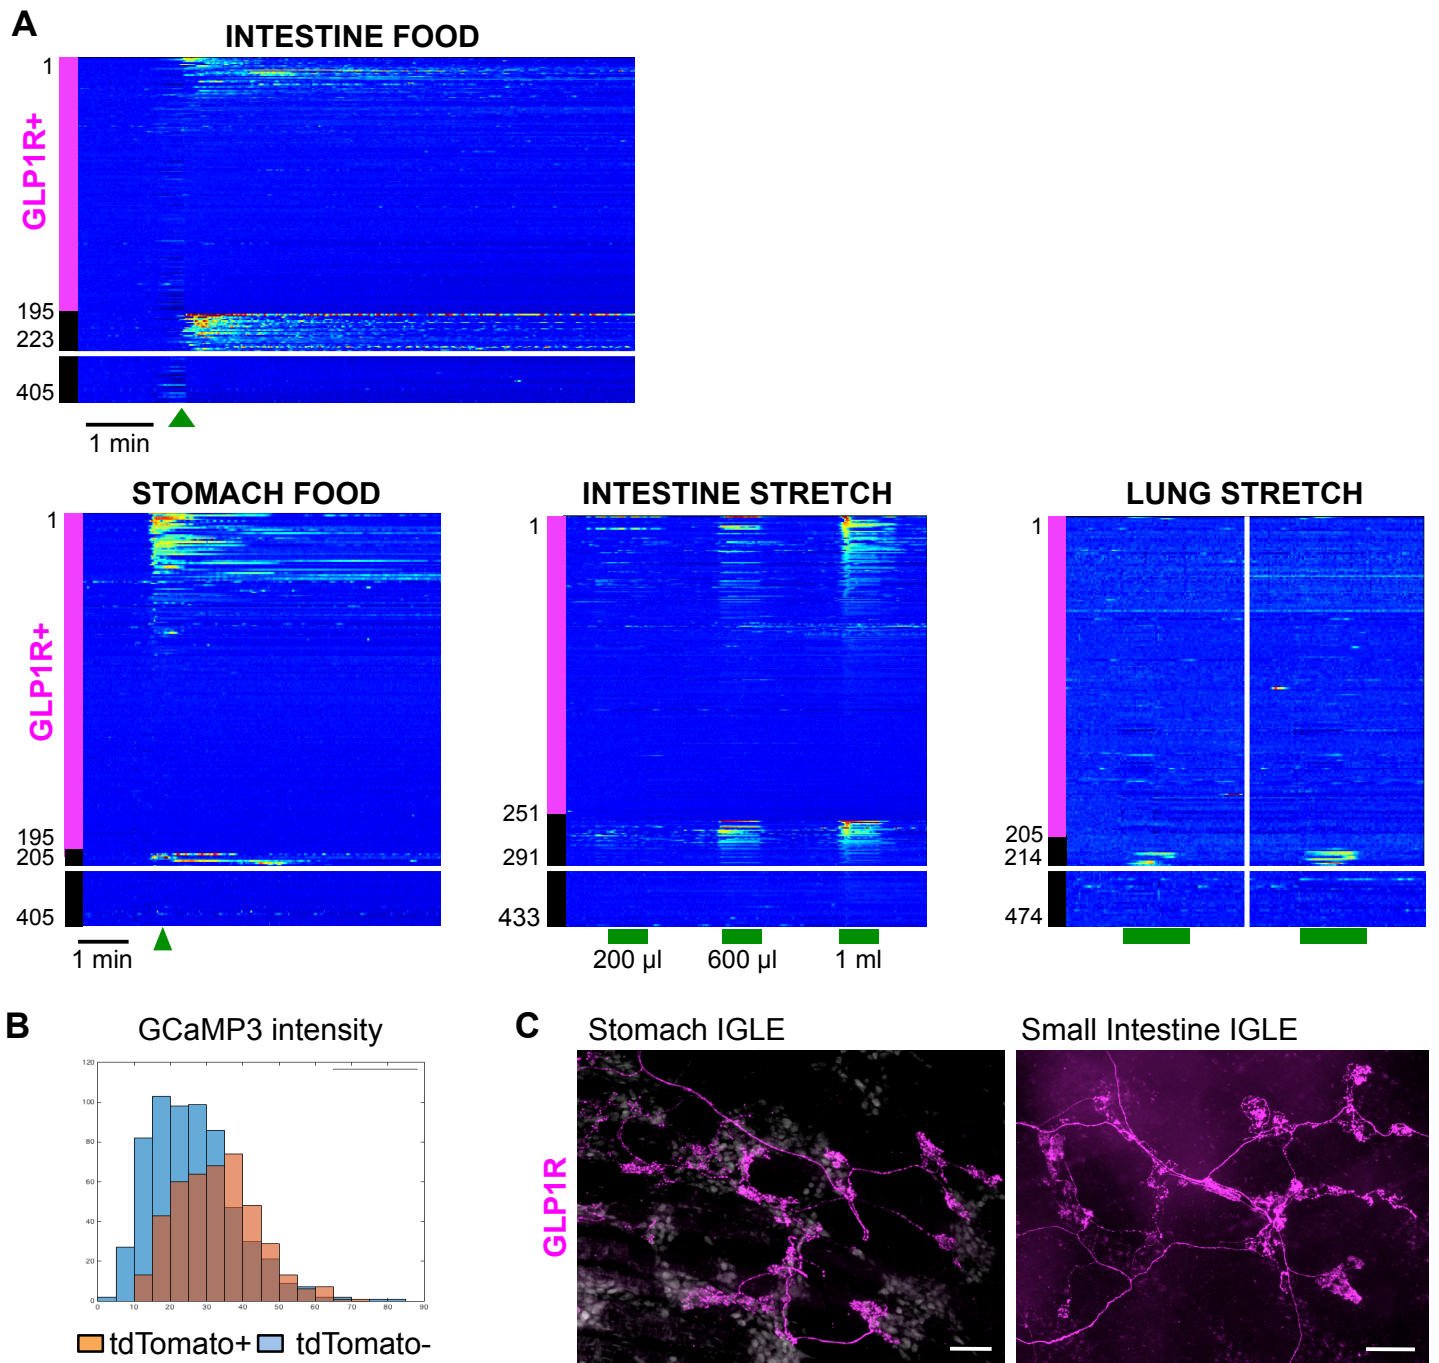

**Figure S4**

Supplement: NIHMS784774-supplement-4.pdf [file NIHMS784774-supplement-4.pdf]

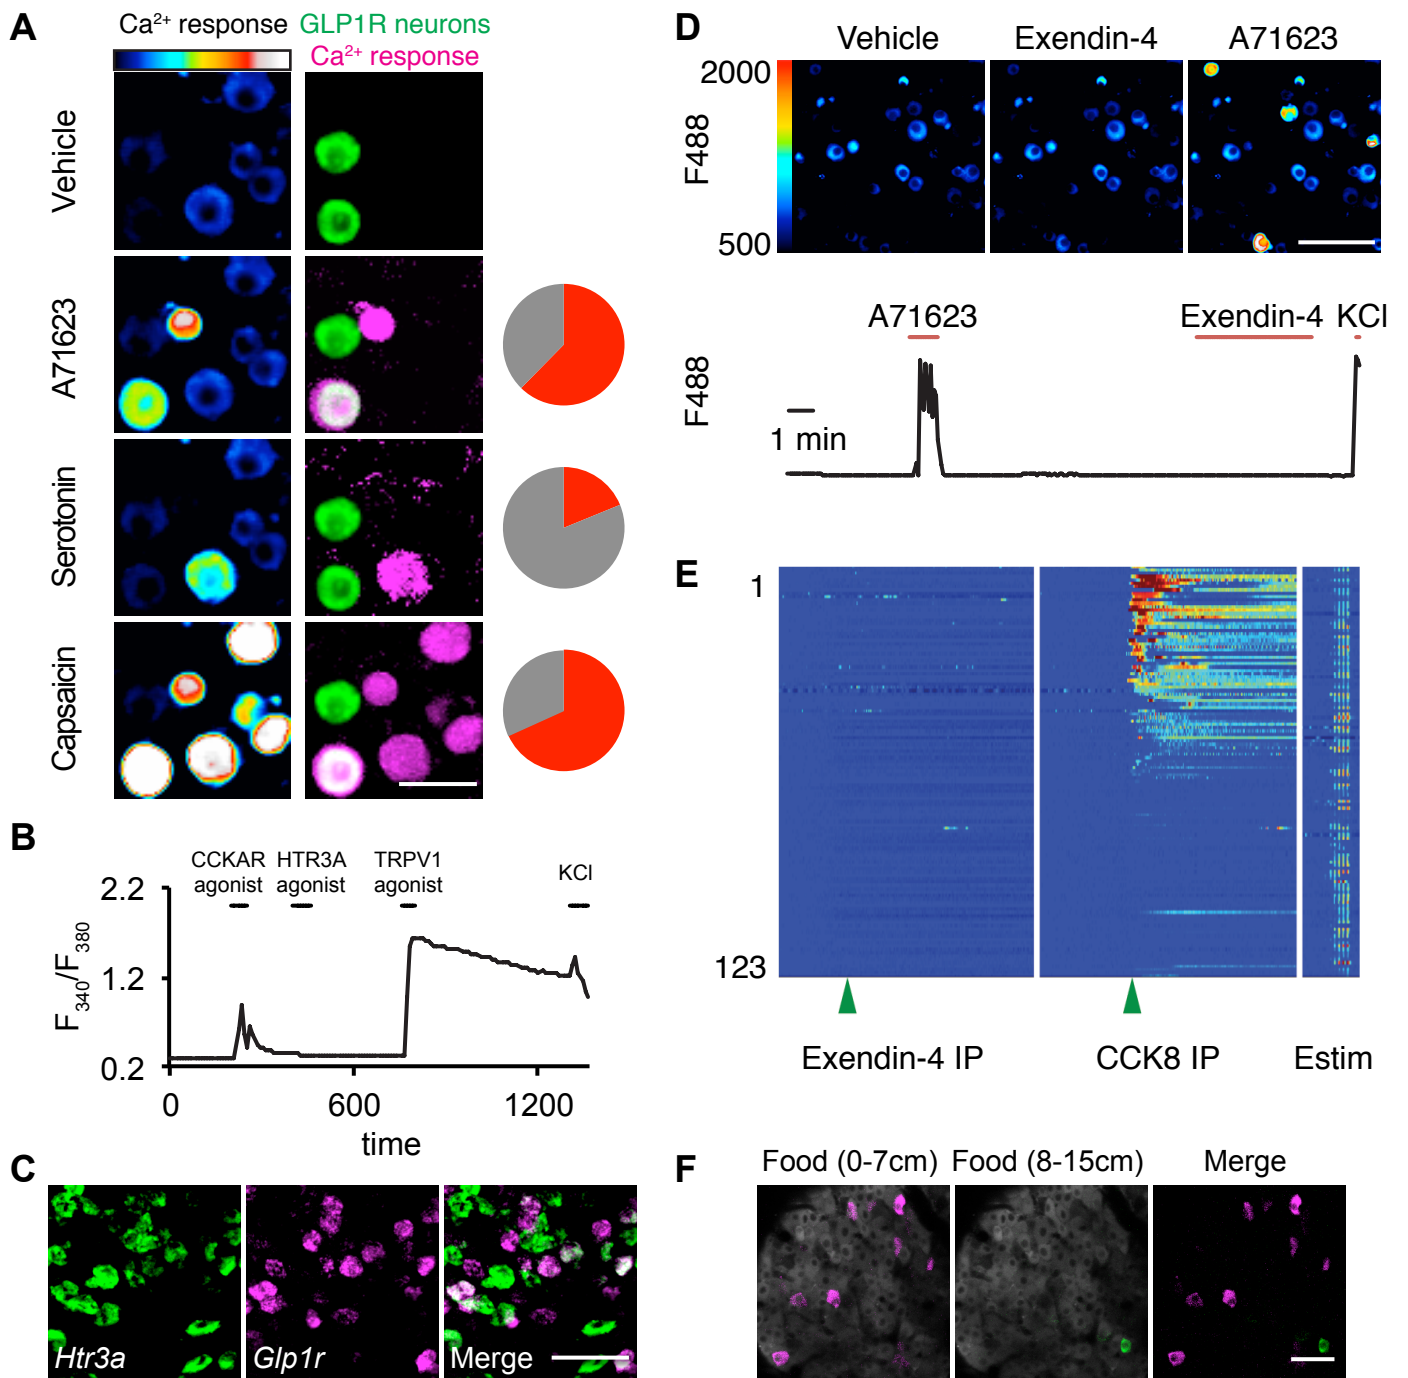

**Figure S6**

Supplement: NIHMS784774-supplement-6.pdf [file NIHMS784774-supplement-6.pdf]
